# Supplementary material for: Variant Anatomy and Its Terminology
Source: PubMed Central journal article supplement (PMC7766054; doi:10.3390/medicina56120713), 2020-12-18

Review

# Variant Anatomy And Its Terminology

David Kachlik <sup>1,2</sup>, Václav Báča <sup>2</sup>, Vladimír Musil <sup>3</sup> and Ivan Varga <sup>4,\*</sup>

<sup>1</sup> Department of Anatomy, Second Faculty of Medicine, Charles University, V Úvalu 84, 15006 Prague, Czech Republic; david.kachlik@lfmotol.cuni.cz

<sup>2</sup> Department of Health Care Studies, College of Polytechnics Jihlava, Tolstého 16, 58601 Jihlava, Czech Republic; vaclav.baca@vspj.cz

<sup>3</sup> Centre of Scientific Information, Third Faculty of Medicine, Charles University, Ruská 87, 10000, Prague, Czech Republic; vladimir.musil@lf3.cuni.cz

<sup>4</sup> Institute of Histology and Embryology, Faculty of Medicine, Comenius University in Bratislava, 81372 Bratislava, Slovakia; ivan.varga@fmed.uniba.sk

\* Correspondence: Correspondence: ivan.varga@fmed.uniba.sk; Tel.: +421 2 90 119 547 (I.V.)

Received: date; Accepted: date; Published: 21 December 2020

## Supplementary Material

**Table S1.** List of the variant anatomy terms included in the *Terminologia Anatomica* [39].

| Identification number | Latin term                                     |
|-----------------------|------------------------------------------------|
| A01.2.05.004          | (Foveola coccygea)                             |
| A01.2.05.009          | (Trigonum lumbale inferius)                    |
| A01.2.05.010          | (Trigonum lumbale superius)                    |
| A02.1.00.043          | (Os suturale)                                  |
| A02.1.00.063          | (Torus palatinus)                              |
| A02.1.03.007          | (Sutura frontalis persistens; Sutura metopica) |
| A02.1.03.024          | (Spina trochlearis)                            |
| A02.1.04.013          | (Os interparietale)                            |
| A02.1.04.023          | (Crista occipitalis externa)                   |
| A02.1.04.030          | (Crista occipitalis interna)                   |
| A02.1.04.035          | (Processus paramastoideus)                     |
| A02.1.05.008          | (Processus clinoides medius)                   |
| A02.1.05.037          | (Foramen venosum)                              |
| A02.1.05.039          | (Foramen petrosum)                             |
| A02.1.06.070          | (Spina suprameatica; Spina suprameatalis)      |
| A02.1.12.031          | (Os incisivum; Premaxilla)                     |
| A02.1.12.032          | (Sutura incisiva)                              |
| A02.1.14.008          | (Tuberculum marginale) ossis zygomatici        |
| A02.1.15.004          | (Symphysis mandibulae)                         |
| A02.1.15.013          | (Torus mandibularis)                           |
| A02.1.15.026          | (Tuberositas masseterica)                      |
| A02.1.15.027          | (Tuberositas pterygoidea)                      |
| A02.2.02.110          | (Canalis arteriae vertebralis)                 |
| A02.3.02.013          | (Costa cervicalis; Costa colli)                |

|              |                                                                       |
|--------------|-----------------------------------------------------------------------|
| A02.3.02.020 | (Costa lumbalis)                                                      |
| A02.3.03.009 | (Ossa suprasternalia)                                                 |
| A02.4.04.017 | (Processus supracondylaris)                                           |
| A02.4.08.002 | (Os centrale)                                                         |
| A02.5.01.312 | (Tuberculum obturatorium posterius)                                   |
| A02.5.04.008 | (Trochanter tertius)                                                  |
| A02.5.10.021 | (Os trigonum)                                                         |
| A03.0.00.024 | (Caput articulare)                                                    |
| A03.1.02.012 | (Sutura squamomastoidea)                                              |
| A03.1.05.006 | (Synchondrosis intraoccipitalis posterior)                            |
| A03.1.05.007 | (Synchondrosis intraoccipitalis anterior)                             |
| A03.1.08.003 | (Lig. atlantooccipitale anterius)                                     |
| A03.3.02.007 | (Synchondrosis manubriosternalis)                                     |
| A03.5.01.004 | (Lig. transversum scapulae inferius)                                  |
| A03.5.03.003 | (Discus articularis) articulationis acromioclavicularis               |
| A04.2.01.007 | (M. scalenus minimus)                                                 |
| A04.2.04.008 | (M. levator glandulae thyroideae)                                     |
| A04.3.01.005 | (M. transversus nuchae)                                               |
| A04.3.02.211 | (Mm. rotatores lumborum)                                              |
| A04.4.01.001 | (M. sternalis)                                                        |
| A04.5.04.009 | (Arcus tendineus muscoli levatoris ani)                               |
| A04.7.02.005 | (M. psoas minor)                                                      |
| A04.7.02.064 | (M. abductor metatarsi quinti)                                        |
| A04.7.02.065 | (M. opponens digiti minimi)                                           |
| A04.8.03.003 | (Bursa subcutanea acromialis)                                         |
| A04.8.03.006 | (Bursa muscoli coracobrachialis)                                      |
| A04.8.03.012 | (Bursa intratendinea olecrani)                                        |
| A04.8.03.015 | (Bursa cubitalis interossea)                                          |
| A04.8.05.011 | (Bursa iliopectinea)                                                  |
| A04.8.05.015 | (Bursa subfascialis prepatellaris)                                    |
| A04.8.05.016 | (Bursa subtendinea prepatellaris)                                     |
| A05.1.03.071 | (Tuberculum anomale) dentis                                           |
| A05.1.03.078 | (Distema)                                                             |
| A05.1.04.021 | (Ductus thyroglossalis)                                               |
| A05.2.01.006 | (Plica triangularis faucium)                                          |
| A05.2.01.008 | (Plica semilunaris faucium)                                           |
| A05.2.01.013 | (Fissura tonsillaris) tonsillae palatinae; (Fissura intratonsillaris) |
| A05.3.01.010 | (Bursa pharyngealis)                                                  |
| A05.6.04.003 | (Diverticulum ilei)                                                   |
| A05.7.02.010 | (Fascia precaecocolica)                                               |
| A05.9.01.018 | (Pancreas accessorium)                                                |
| A06.1.02.033 | (Ductus incisivus)                                                    |

|              |                                                                  |
|--------------|------------------------------------------------------------------|
| A06.2.02.012 | (Foramen thyroideum) cartilaginis thyroideae                     |
| A06.2.04.018 | (Cartilago sesamoidea) laryngis                                  |
| A06.2.08.005 | (M. ceratocricoideus)                                            |
| A08.1.05.008 | (Typus ampullaris) pelvis renalis                                |
| A09.1.06.002 | (Ductus deferens vestigialis)                                    |
| A09.2.03.015 | (Ductus paraurethrales)                                          |
| A09.3.02.008 | (Ductulus aberrans superior)                                     |
| A09.3.02.009 | (Ductulus aberrans inferior)                                     |
| A09.3.02.011 | (Appendix epididymidis)                                          |
| A09.3.03.001 | (Paradidymis)                                                    |
| A09.3.04.006 | (Vestigium processus vaginalis peritonei)                        |
| A09.3.08.015 | (Lobus medius prostatae)                                         |
| A09.4.02.023 | (Valvula fossae navicularis)                                     |
| A10.1.02.011 | (Mesocolon ascendens)                                            |
| A10.1.02.012 | (Mesocolon descendens)                                           |
| A10.1.02.106 | (Lig. hepatocolicum)                                             |
| A10.1.02.205 | (Lig. gastrocolicum)                                             |
| A10.1.02.414 | (Plica paraduodenalis)                                           |
| A10.1.02.415 | (Recessus paraduodenalis)                                        |
| A10.1.02.416 | (Recessus retroduodenalis)                                       |
| A11.3.00.004 | (Lobus pyramidalis) glandulae thyroideae                         |
| A12.1.01.007 | (Foramen ovale cordis)                                           |
| A12.2.01.202 | (Ductus arteriosus)                                              |
| A12.2.03.111 | (R. posterolateralis dexter) arteriae coronariae dextrae         |
| A12.2.03.212 | (R. nodi sinuatrialis) arteriae coronariae sinistrae             |
| A12.2.03.213 | (R. nodi atrioventricularis) arteriae coronariae sinistrae       |
| A12.2.04.002 | (Isthmus aortae)                                                 |
| A12.2.04.005 | (A. thyroidea ima)                                               |
| A12.2.05.014 | (Truncus linguofacialis)                                         |
| A12.2.05.035 | (R. meningeus) arteriae occipitalis                              |
| A12.2.05.041 | (R. stapedius arteriae auricularis posterioris)                  |
| A12.2.06.020 | (A. uncalis)                                                     |
| A12.2.07.003 | (Rr. choroidei ventriculi tertii) arteriae choroideae anterioris |
| A12.2.07.014 | (Rr. uncales) arteriae choroideae anterioris                     |
| A12.2.07.016 | (Rr. tuberis cinerei) arteriae choroideae anterioris             |
| A12.2.07.017 | (Rr. nucleorum hypothalami) arteriae choroideae anterioris       |
| A12.2.07.042 | (Rr. paracentrales) arteriae pericallosae                        |
| A12.2.08.032 | (Rr. bronchiales) arteriae thoracicae internae                   |
| A12.2.08.033 | (Rr. tracheales) arteriae thoracicae internae                    |
| A12.2.08.038 | (R. costalis lateralis) arteriae thoracicae internae             |
| A12.2.08.058 | (A. dorsalis scapulae)                                           |
| A12.2.09.019 | (A. brachialis superficialis)                                    |

|              |                                                                         |
|--------------|-------------------------------------------------------------------------|
| A12.2.12.017 | (A. supraduodenalis)                                                    |
| A12.2.15.032 | (A. azygos vaginae) ♀                                                   |
| A12.2.16.006 | (A. obturatoria accessoria)                                             |
| A12.2.16.044 | (A. recurrens tibialis posterior)                                       |
| A12.2.16.051 | (A. arcuata)                                                            |
| A12.2.16.070 | (Arcus plantaris superficialis)                                         |
| A12.3.01.016 | (Vv. atriales sinistrae)                                                |
| A12.3.01.017 | (Vv. ventriculares sinistrae)                                           |
| A12.3.02.110 | Pars intralobaris (intersegmentalis) v. posterioris pulmonalis dx. sup. |
| A12.3.04.015 | (V. vertebralis accessoria)                                             |
| A12.3.08.017 | (V. cephalica accessoria)                                               |
| A13.1.02.006 | (Lobuli thymici accessorii)                                             |
| A13.2.01.012 | (Facies pancreatica splenis)                                            |
| A13.2.01.022 | (Splen accessorius)                                                     |
| A13.3.02.008 | (Nodus lymphoideus ligamenti arteriosi)                                 |
| A13.3.02.009 | (Nodus lymphoideus arcus venae azygos)                                  |
| A13.3.03.017 | (Anulus lymphaticus cardiae)                                            |
| A13.3.03.020 | (Nodus lymphoideus suprapyloricus)                                      |
| A13.3.03.021 | (Nodi lymphoidei subpylorici)                                           |
| A13.3.03.022 | (Nodi lymphoidei retropylorici)                                         |
| A13.3.04.013 | (Nodus lymphoideus lacunaris medialis)                                  |
| A13.3.04.014 | (Nodus lymphoideus lacunaris intermedius)                               |
| A13.3.04.015 | (Nodus lymphoideus lacunaris lateralis)                                 |
| A13.3.05.008 | (Nodus lymphoideus inguinalis profundus proximalis)                     |
| A13.3.05.009 | (Nodus lymphoideus inguinalis profundus intermedius)                    |
| A13.3.05.014 | (Nodus lymphoideus tibialis anterior)                                   |
| A13.3.05.015 | (Nodus lymphoideus tibialis posterior)                                  |
| A13.3.05.016 | (Nodus lymphoideus fibularis)                                           |
| A14.1.01.109 | (Spatium subdurale)                                                     |
| A14.1.01.110 | (Spatium epidurale; Spatium extradurale)                                |
| A14.2.01.112 | (R. lingualis) nervi facialis                                           |
| A14.2.02.031 | (Nn. phrenici accessorii)                                               |
| A14.3.01.019 | (Ganglion cervicale inferius)                                           |
| A15.2.03.036 | (Membrana pupillaris)                                                   |
| A15.2.06.009 | (A. hyaloidea)                                                          |
| A15.2.07.061 | (Glandulae lacrimales accessoriae)                                      |
| A15.3.01.020 | (Tuberculum auriculare)                                                 |
| A15.3.01.021 | (Apex auriculae)                                                        |
| A15.3.01.023 | (Tuberculum supratragicum)                                              |
| A15.3.01.040 | (M. incisurae terminalis)                                               |
| A16.0.02.003 | (Mamma accessoria)                                                      |

**Table S2.** List of the variant anatomy terms included in the *Terminologia Neuroanatomica* [38] (compared to *Terminologia Anatomica* [39]).

| TNA 2017                                                          | TA 1998                                                          |
|-------------------------------------------------------------------|------------------------------------------------------------------|
| <b>Systema nervosum centrale</b>                                  |                                                                  |
| (Spatium epidurale)                                               | (Spatium epidurale; Spatium extradurale)                         |
| (Spatium subdurale)                                               | (Spatium subdurale)                                              |
| (Arteria hypoglossa persistens)                                   | -                                                                |
| (Arteria trigemina persistens)                                    | -                                                                |
| (Arteria otica persistens)                                        | -                                                                |
| (Rami choroidei ventriculi tertii) arteriae choroideae anterioris | (Rr. choroidei ventriculi tertii) arteriae choroideae anterioris |
| (Rami uncales) arteriae choroideae anterioris                     | (Rr. uncales) arteriae choroideae anterioris                     |
| (Rami tuberis cinerei) arteriae choroideae anterioris             | (Rr. tuberis cinerei) arteriae choroideae anterioris             |
| (Rami nucleorum hypothalami) arteriae choroideae anterioris       | (Rr. nucleorum hypothalami) arteriae choroideae anterioris       |
| (Arteria subcallosa)                                              | -                                                                |
| (Rami paracentrales) arteriae cerebri anterioris                  | (Rr. paracentrales) arteriae pericallosae                        |
| (Arteria proatlantica)                                            | -                                                                |
| (Ramus meningeus) arteriae cerebelli inferioris posterioris       | -                                                                |
| (Sinus occipitalis obliquus)                                      | -                                                                |
| (Plexus venosus falcis)                                           | -                                                                |
| (Sinus intercavernosus inferior)                                  | -                                                                |
| (Cellula rotiformis)                                              | -                                                                |
| <b>Systema nervosum periphericum</b>                              |                                                                  |
| (Nervus ethmoidalis posterior)                                    | -                                                                |
| (Rami ganglionares sublinguales)                                  | -                                                                |
| (Ramus lingualis) nervi facialis                                  | (R. lingualis) n. facialis                                       |
| (Radix posterior nervi spinalis C1)                               | -                                                                |
| (Ganglion spinale nervi spinalis C1)                              | -                                                                |
| (Ramus cutaneus posterior) nervi cervicalis quinti                | -                                                                |
| (Nervus phrenicus accessorius)                                    | (Nn. phrenici accessorii)                                        |
| (Radix lateralis nervi ulnaris)                                   | -                                                                |
| (Ramus communicans ulnaris) nervi mediani                         | -                                                                |
| (Nervus intercostobrachialis accessorius)                         | -                                                                |
| (Ramus communicans iliohypogastricus) nervi thoracici duodecimi   | -                                                                |
| (Nervus obturatorius accessorius)                                 | -                                                                |
| (Ganglion vertebrale)                                             | -                                                                |
| (Radix sympathica ganglii sublingualis)                           | -                                                                |
| (Ganglion sublinguale)                                            | -                                                                |

| Organa sensuum                   |                                    |
|----------------------------------|------------------------------------|
| (Arteria cilioretinalis)         | -                                  |
| (Membrana pupillaris)            | (Membrana pupillaris)              |
| (Arteria hyaloidea)              | (A. hyaloidea)                     |
| (Glandula lacrimalis accessoria) | (Glandulae lacrimales accessoriae) |
| (Tuberculum auriculare)          | (Tuberculum auriculare)            |
| (Apex auriculae)                 | (Apex auriculae)                   |
| (Tuberculum supratragicum)       | (Tuberculum supratragicum)         |
| (Musculus incisurae terminalis)  | -                                  |
| (Ramus vestibularis anterior)    | -                                  |

**Table S3.** Items in the *Terminologia Anatomica* [39], *Terminologia Histologica* [145] originated from generally used eponyms.

| Eponym                                | Identification number | Latin term                                                       | English equivalent                  |
|---------------------------------------|-----------------------|------------------------------------------------------------------|-------------------------------------|
| Jan Evangelista Purkyně<br>(Purkinje) | A14.1.07.404          | Stratum purkinjense                                              | Purkinje cell layer                 |
| Ammon (Ra)                            | A14.1.09.327          | Hippocampus proprius;<br>Cornu ammonis                           | Hippocampus proper;<br>Ammon's horn |
| Camillo Golgi                         | H1.00.01.3.01046      | Complexus golgiensis;<br>Apparatus golgiensis                    | Golgi complex; Golgi apparatus      |
| Schwann                               | H2.00.06.2.02003      | Schwannocytus;<br>Neurolemmocytus                                | Schwann cell;<br>Neurolemmocyte     |
| Paneth                                | H3.04.03.0.00017      | Cellula panethensis;<br>Exocrinocytus cum granulis acidophilicus | Paneth cell                         |

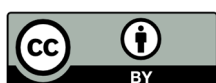

Supplement: medicina-56-00713-s001.pdf [file medicina-56-00713-s001.pdf]
